# Supplementary material
Source: HighWire-hosted journal article supplement (https://cmaj.ca/highwire/filestream/58545/field_highwire_adjunct_files/0/manage-goetz-1-at.pdf)

**Appendix 1: Example of how feedback from the European Practice Assessment is provided to an individual primary care practice using the Visotool®. (More information is available at [www.epa-qm.de](http://www.epa-qm.de).)**

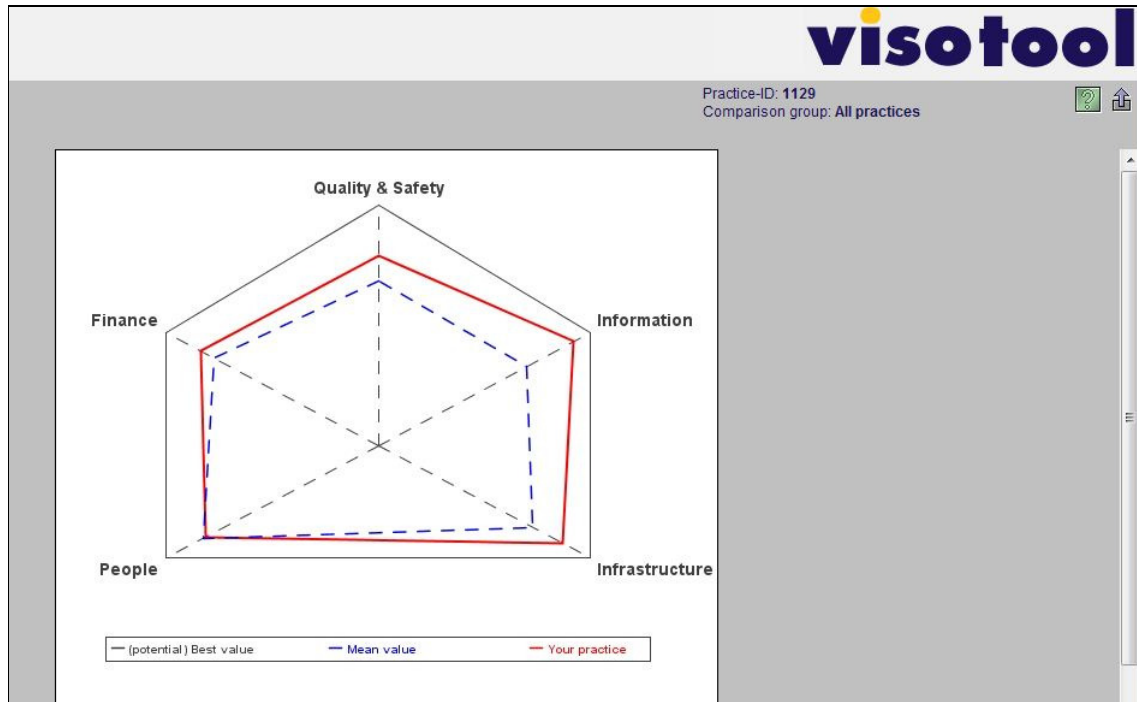

Supplement: manage-goetz-1-at.pdf [file manage-goetz-1-at.pdf]
